# Supplementary material for: Ferrocene/fullerene hybrids showing large second-order nonlinear optical activities: impact of the cage unit size
Source: Royal Society of Chemistry journal article supplement (doi:10.1039/c5dt01134e), 2015-01-01
Supplement: c5dt01134e1.pdf [file c5dt01134e1.pdf]

**Supporting information for**

**Ferrocene/fullerene hybrids showing large second-order nonlinear  
optical activities: impact of the cage unit size**

Wen-Yong Wang,<sup>a</sup> Li Wang,<sup>a</sup> Na-Na Ma,<sup>b</sup> Chang-Li Zhu,<sup>a</sup> and Yong-Qing Qiu<sup>\*,a</sup>

<sup>a</sup>Institute of Functional Material Chemistry, Faculty of Chemistry, Northeast Normal University,  
Changchun 130024, Jilin, People's Republic of China

<sup>b</sup>School of Chemistry and Chemical Engineering, Henan Normal University, Xinxiang, Henan  
453007, People's Republic of China

---

\* Corresponding Author. Fax: +86 431 85098768.  
E-mail addresses: qiuyq466@nenu.edu.cn (Y. Q. Qiu)

**Table S1.** Total electronic energies (a.u.) of eclipsed and staggered isomers of complexes **1-4** and their relative energies (kcal/mol) (where  $\Delta E_{\text{rel}} = E(\text{staggered}) - E(\text{eclipsed})$ ).

| eclipsed | energy         | staggered | energy         | $\Delta E_{\text{rel}}$ |
|----------|----------------|-----------|----------------|-------------------------|
| <b>1</b> | -2606.64802716 | <b>1</b>  | -2606.64694805 | 0.68                    |
| <b>2</b> | -2835.08901522 | <b>2</b>  | -2835.08784618 | 0.73                    |
| <b>3</b> | -2987.75677473 | <b>3</b>  | -2987.75562097 | 0.72                    |
| <b>4</b> | -3368.69660652 | <b>4</b>  | -3368.69555729 | 0.66                    |

**Table S2.** The charge distributions of H, Cp, Fe, and fullerene of complexes **1-4** obtained at the  $\omega$ B97XD/6-31+G\*.

| Complex  | Charge/a.u.    |        |       |           |                |
|----------|----------------|--------|-------|-----------|----------------|
|          | H <sup>a</sup> | Cp     | Fe    | fullerene | H <sup>b</sup> |
| <b>1</b> | 0.258          | -0.160 | 0.415 | -0.255    | 0.282          |
| <b>2</b> | 0.260          | -0.131 | 0.427 | -0.296    | 0.281          |
| <b>3</b> | 0.258          | -0.157 | 0.414 | -0.257    | 0.283          |
| <b>4</b> | 0.257          | -0.162 | 0.411 | -0.249    | 0.284          |

<sup>a</sup> the average NBO charge of H atom of Cp. <sup>b</sup> the average NBO charge of H atom of fullerene.

**Table S3.** Tensorial components ( $10^{-30}$  esu) of the studied complexes.

| Method         | Tensorial component | 1      | 2       | 3      | 4        |
|----------------|---------------------|--------|---------|--------|----------|
| BHandHLYP      | $\beta_{xxx}$       | -0.000 | -0.062  | 0.000  | 4.142    |
|                | $\beta_{xxy}$       | 0.005  | 0.143   | -0.005 | -0.841   |
|                | $\beta_{xyy}$       | -0.000 | 0.410   | 0.000  | 1.376    |
|                | $\beta_{yyy}$       | -0.000 | -13.287 | -0.011 | -2.505   |
|                | $\beta_{xxz}$       | 1.359  | 2.461   | 5.582  | -77.388  |
|                | $\beta_{xyz}$       | -0.000 | 0.250   | 0.000  | 0.025    |
|                | $\beta_{yyz}$       | 1.364  | -6.630  | 5.590  | -77.388  |
|                | $\beta_{xzz}$       | -0.000 | -0.008  | 0.000  | 0.991    |
|                | $\beta_{yzz}$       | 0.004  | -0.790  | -0.001 | -0.636   |
| CAM-B3LYP      | $\beta_{zzz}$       | 3.740  | 9.277   | 5.520  | -210.561 |
|                | $\beta_{xxx}$       | -0.000 | -0.067  | -0.000 | 7.491    |
|                | $\beta_{xxy}$       | 0.005  | 0.299   | -0.005 | -1.530   |
|                | $\beta_{xyy}$       | -0.000 | 0.359   | -0.000 | 2.490    |
|                | $\beta_{yyy}$       | -0.000 | -11.232 | -0.010 | -4.561   |
|                | $\beta_{xxz}$       | 1.463  | 2.114   | 5.557  | -140.505 |
|                | $\beta_{xyz}$       | -0.000 | 0.023   | -0.000 | 0.007    |
|                | $\beta_{yyz}$       | 1.468  | -6.057  | 5.564  | -140.530 |
|                | $\beta_{xzz}$       | -0.000 | 0.010   | -0.000 | 4.497    |
| LC-BLYP        | $\beta_{yzz}$       | 0.005  | -1.425  | 0.000  | -2.821   |
|                | $\beta_{zzz}$       | 2.906  | 8.389   | 4.490  | -535.752 |
|                | $\beta_{xxx}$       | -0.000 | -0.145  | -0.000 | 1.065    |
|                | $\beta_{xxy}$       | 0.000  | 1.370   | -0.003 | -0.224   |
|                | $\beta_{xyy}$       | -0.000 | 0.214   | 0.000  | 0.356    |
|                | $\beta_{yyy}$       | 0.002  | -4.485  | -0.005 | -0.628   |
|                | $\beta_{xxz}$       | 1.422  | 1.693   | 4.848  | -20.521  |
|                | $\beta_{xyz}$       | 0.000  | 0.152   | 0.000  | 0.006    |
|                | $\beta_{yyz}$       | 1.423  | -2.964  | 4.850  | -20.572  |
| $\omega$ B97XD | $\beta_{xzz}$       | -0.000 | 0.039   | -0.000 | 0.918    |
|                | $\beta_{yzz}$       | 0.003  | -2.637  | 0.000  | -0.534   |
|                | $\beta_{zzz}$       | 3.266  | 8.095   | 4.684  | -93.653  |
|                | $\beta_{xxx}$       | -0.000 | -0.084  | -0.000 | -1.888   |
|                | $\beta_{xxy}$       | 0.013  | 0.533   | -0.009 | 0.371    |
|                | $\beta_{xyy}$       | -0.000 | 0.312   | 0.000  | -0.645   |
|                | $\beta_{yyy}$       | 0.007  | -9.165  | -0.019 | 1.170    |
|                | $\beta_{xxz}$       | 1.520  | 2.105   | 5.367  | 34.806   |
|                | $\beta_{xyz}$       | 0.000  | 0.214   | 0.000  | 0.104    |
|                | $\beta_{yyz}$       | 1.523  | -5.177  | 6.367  | 34.883   |
|                | $\beta_{xzz}$       | -0.000 | 0.021   | 0.000  | 8.241    |
|                | $\beta_{yzz}$       | 0.000  | -2.051  | -0.013 | -4.972   |

---

|               |       |       |       |          |
|---------------|-------|-------|-------|----------|
| $\beta_{zzz}$ | 3.488 | 9.280 | 4.884 | -392.357 |
|---------------|-------|-------|-------|----------|

---

**Table S4.** The transition energies, oscillator strengths, differences of dipole moment between the ground and crucial excited state, and  $\Delta\mu_{\text{ge}}f_{\text{os}}/\Delta E_{\text{ge}}^3$  values of complexes **1-4** calculated at the TD- $\omega$ B97XD/6-31+G\* (SDD basis set for Fe ion) level.

| complex  | $f_{\text{os}}$ | $\Delta E$ | $\Delta\mu_{\text{ge}}$ | $\Delta E_{\text{ge}}^3$ | $\Delta\mu_{\text{ge}}f_{\text{os}}/\Delta E_{\text{ge}}^3$ |
|----------|-----------------|------------|-------------------------|--------------------------|-------------------------------------------------------------|
| <b>1</b> | 0.0270          | 3.30       | 2.32                    | 35.94                    | 0.0017                                                      |
| <b>2</b> | 0.0431          | 2.30       | 2.73                    | 12.17                    | 0.0097                                                      |
| <b>3</b> | 0.0587          | 2.37       | 8.18                    | 13.31                    | 0.0361                                                      |
| <b>4</b> | 0.0269          | 1.29       | 5.81                    | 2.15                     | 0.0728                                                      |

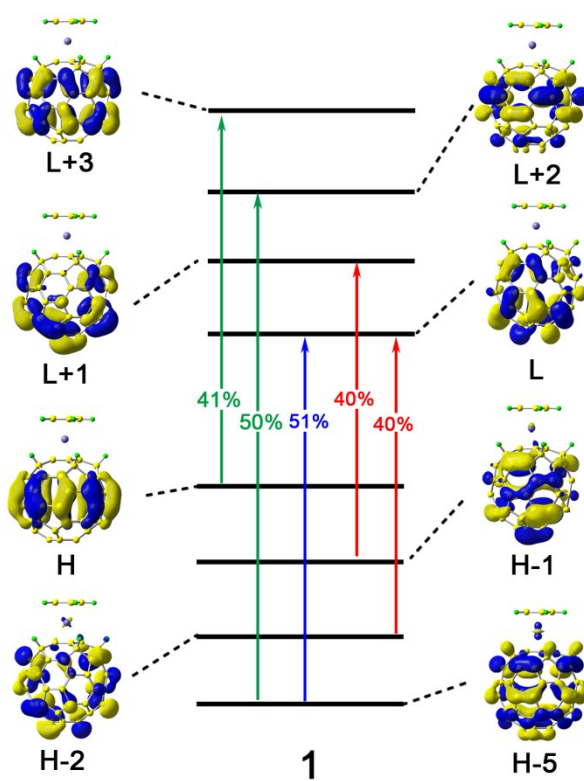

**Figure S1.** The molecular orbitals involved in the relatively intense electronic transitions in the absorption spectrum of complex **1**

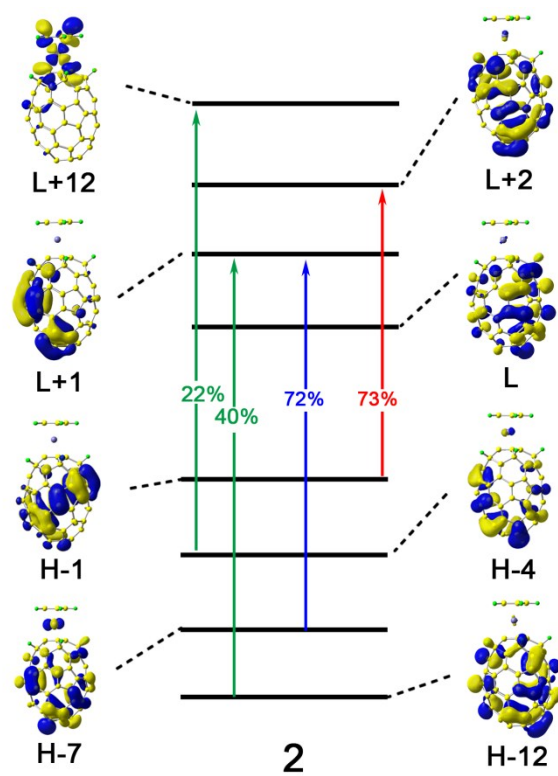

**Figure S2.** The molecular orbitals involved in the relatively intense electronic transitions in the absorption spectrum of complex **2**



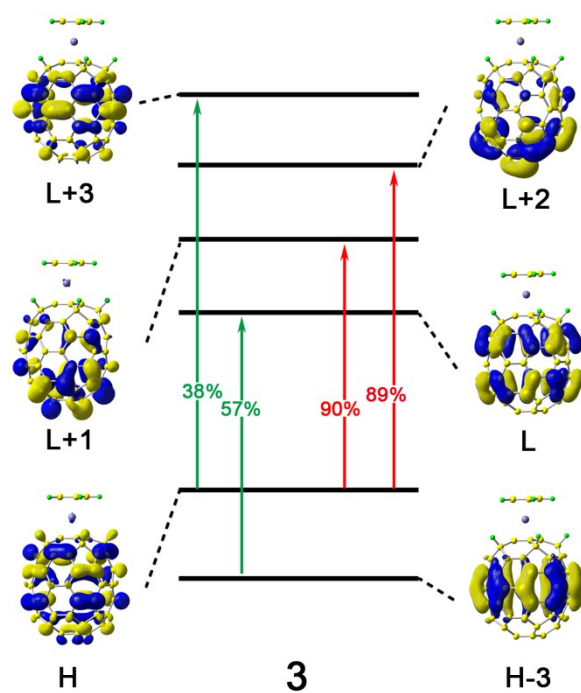

**Figure S3.** The molecular orbitals involved in the relatively intense electronic transitions in the absorption spectrum of complex **3**.

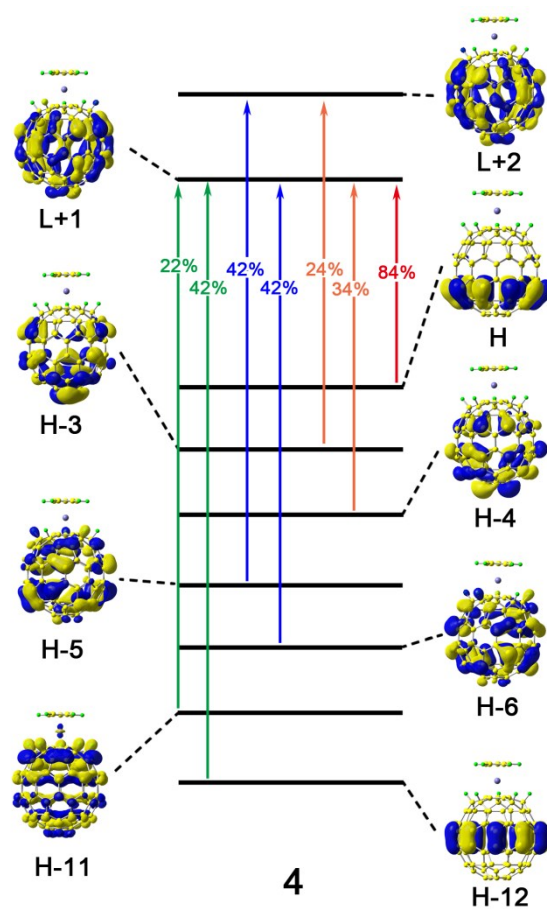

**Figure S4.** The molecular orbitals involved in the relatively intense electronic transitions in the absorption spectrum of complex 4.
